# Supplementary material for: Distinct features between MLH1-methylated and unmethylated colorectal carcinomas with the CpG island methylator phenotype: implications in the serrated neoplasia pathway
Source: PubMed Central journal article supplement (PMC4924700; doi:10.18632/oncotarget.7374), 2016-02-13
Supplement: oncotarget-07-14095-s001.pdf [file oncotarget-07-14095-s001.pdf]

## Distinct features between *MLH1*-methylated and unmethylated colorectal carcinomas with the CpG island methylator phenotype: implications in the serrated neoplasia pathway

### Supplementary Material

**Supplementary Table S1.** Comparison of the frequency of mucinous differentiation between *MLH1*-methylated and unmethylated tumors in proximal-located CIMP-H colon carcinomas (original study cohort; n = 45)

|                    |         | Case No. | <i>MLH1</i> -methylated (n = 27) | <i>MLH1</i> -unmethylated (n = 18) | <i>P</i> -value |
|--------------------|---------|----------|----------------------------------|------------------------------------|-----------------|
| Mucinous histology | Absent  | 22       | 8 (30%)                          | 14 (78%)                           | 0.002           |
|                    | Present | 23       | 19 (70%)                         | 4 (22%)                            |                 |

**Supplementary Table S2.** Comparison of the frequency of mucinous differentiation between *MLH1*-methylated and unmethylated tumors in distal-located CIMP-H CRCs (original study cohort; n = 20)

|                    |         | Case No. | <i>MLH1</i> -methylated (n = 6) | <i>MLH1</i> -unmethylated (n = 14) | <i>P</i> -value |
|--------------------|---------|----------|---------------------------------|------------------------------------|-----------------|
| Mucinous histology | Absent  | 12       | 1 (17%)                         | 11 (79%)                           | 0.018           |
|                    | Present | 8        | 5 (83%)                         | 3 (21%)                            |                 |

**Supplementary Table S3.** Comparison of the frequency of mucinous differentiation between MSI-H and MSS/MSI-L tumors in CIMP-L/0

CRCs (independent cohort; n = 687)

|                    |         | Case No. | MSI-H, CIMP-L/0 (n = 47) | MSS/MSI-L, CIMP-L/0 (n = 640) | P-value |
|--------------------|---------|----------|--------------------------|-------------------------------|---------|
| Mucinous histology | Absent  | 613      | 30 (64%)                 | 583 (91%)                     | < 0.001 |
|                    | Present | 74       | 17 (36%)                 | 57 (9%)                       |         |

**Supplementary Table S4.** Clinicopathologic features of *BRAF*-mutated, *MLH1*-unmethylated CIMP-H CRCs (original study cohort; n = 4)

| Case # | Age | Sex    | Tumor location   | TNM stage           | Tumor differentiation     | Lymphatic invasion | Venous invasion | Perineural invasion | Tumor budding | MSI status | Death or tumor recurrence | Disease-free survival |
|--------|-----|--------|------------------|---------------------|---------------------------|--------------------|-----------------|---------------------|---------------|------------|---------------------------|-----------------------|
| SD-074 | 52  | Female | Ascending colon  | Stage IV (pT4N2M1)  | Poorly differentiated     | Present            | Present         | Present             | Present       | MSS        | Yes (death)               | 3.2 months            |
| SD-226 | 49  | Female | Rectum           | Stage IV (pT4N1M1)  | Poorly differentiated     | Present            | Absent          | Present             | Present       | MSS        | Yes (death)               | 3.8 months            |
| SD-461 | 52  | Female | Ascending colon  | Stage II (pT3N0M0)  | Moderately differentiated | Absent             | Absent          | Present             | Present       | MSS        | No                        | 42.7 months           |
| SD-733 | 49  | Female | Transverse colon | Stage III (pT3N2M0) | Moderately differentiated | Present            | Absent          | Present             | Present       | MSS        | Yes (recurrence)          | 19.5 months           |

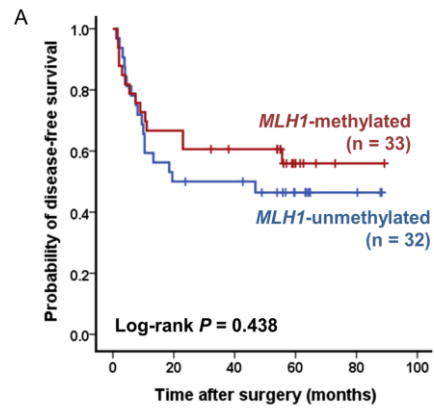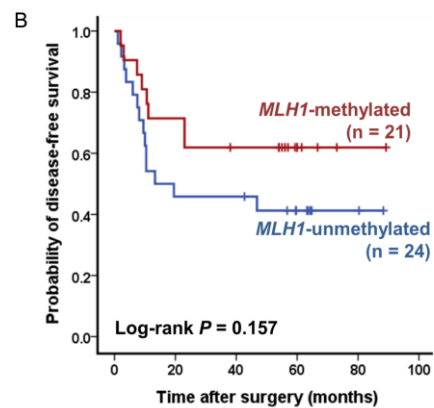

**Supplementary Figure S1.** Kaplan-Meier survival analysis with log-rank test. **(A)** Survival analysis in 65 CIMP-H CRCs. **(B)** Survival analysis in 45 CIMP-H CRCs treated with 5-FU-based adjuvant chemotherapy.

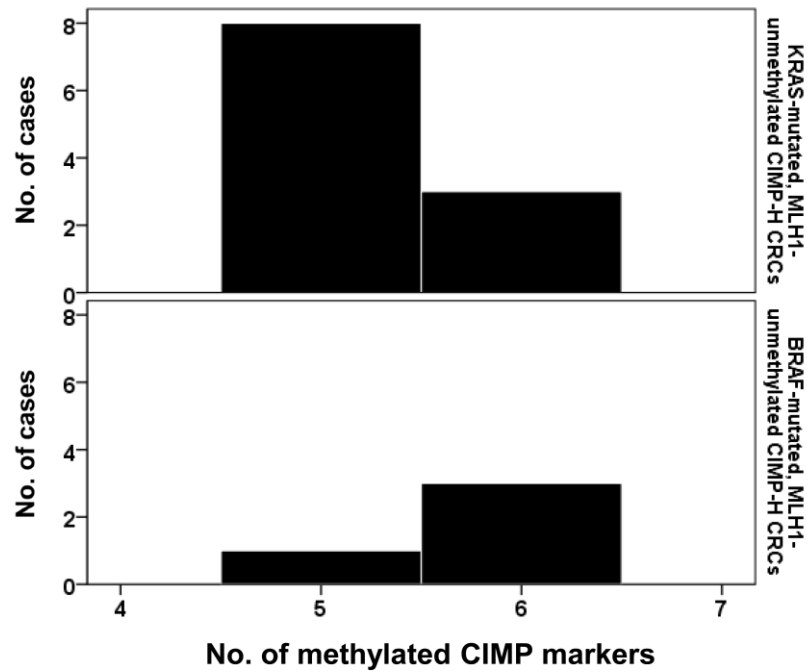

**Supplementary Figure S2.** Comparison of number of methylated CIMP markers between *KRAS*-mutated and *BRAF*-mutated tumors in *MLH1*-unmethylated CIMP-H CRCs (n = 15).
